# Supplementary material
Source: PubMed Central journal article supplement (PMC6658215)
Supplement: NIHMS82431-supplement-Supplementary_Material.pdf [file NIHMS82431-supplement-Supplementary_Material.pdf]

**Supplementary material**

West *et al.* Postprandial incorporation of EPA and DHA from transgenic *Camelina sativa* oil into blood lipids is equivalent to that from fish oil in healthy humans

**Supplementary Figure 1.** Consort diagram

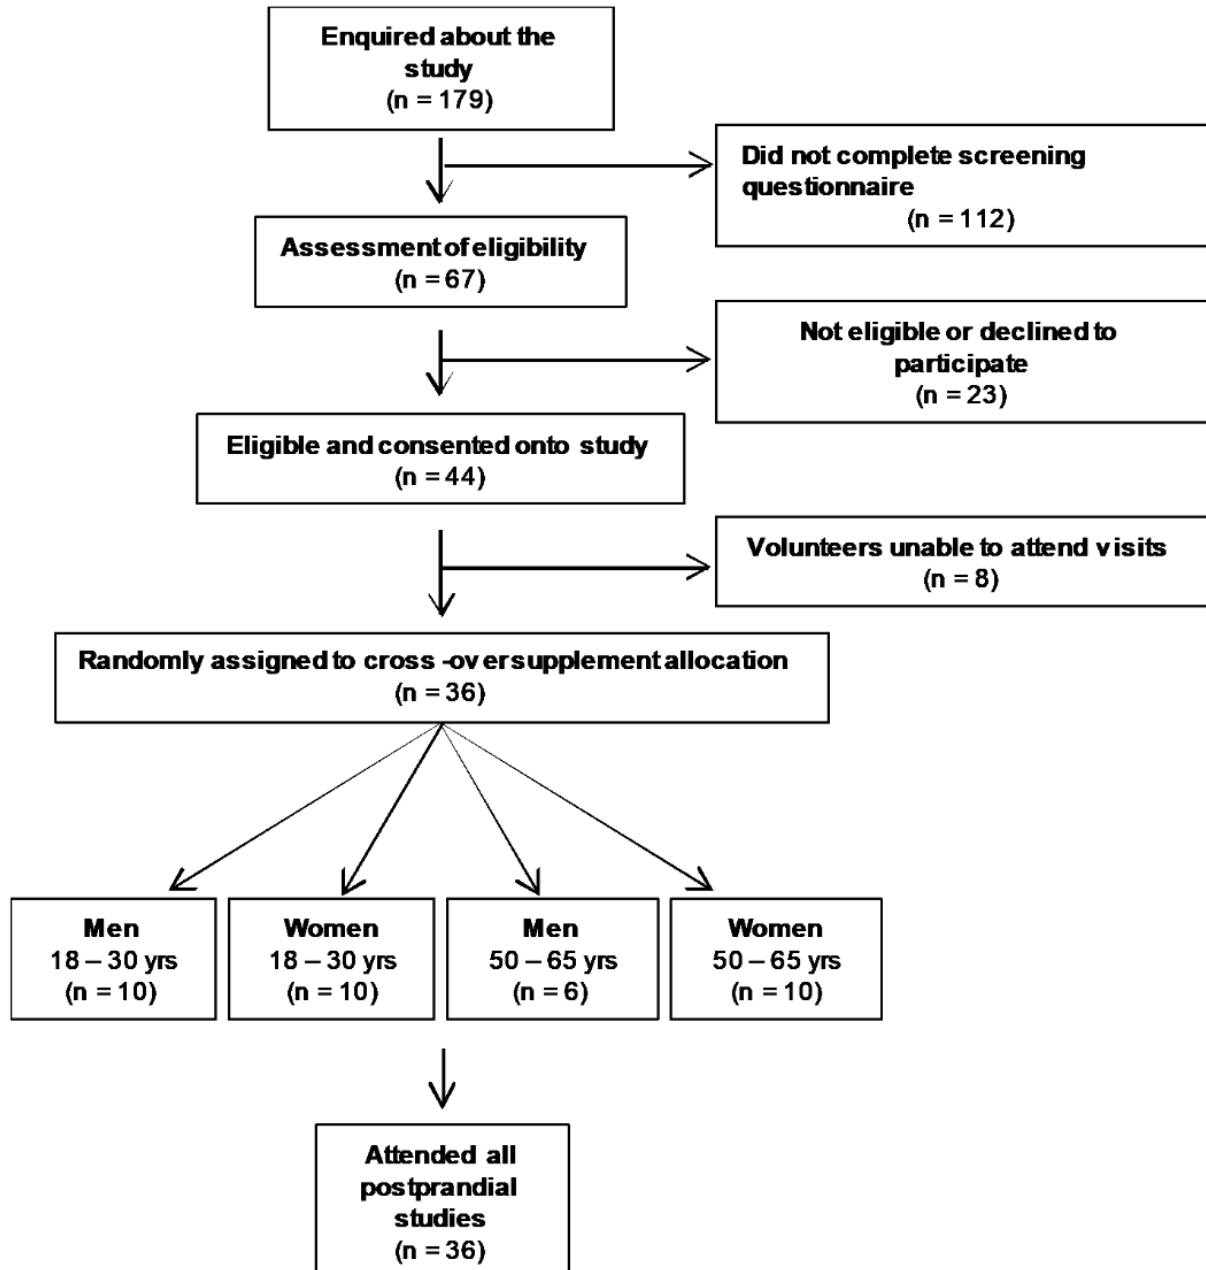

**Supplementary Figure 2.** Postprandial incorporation of EPA plus DHA into plasma triacylglycerol.

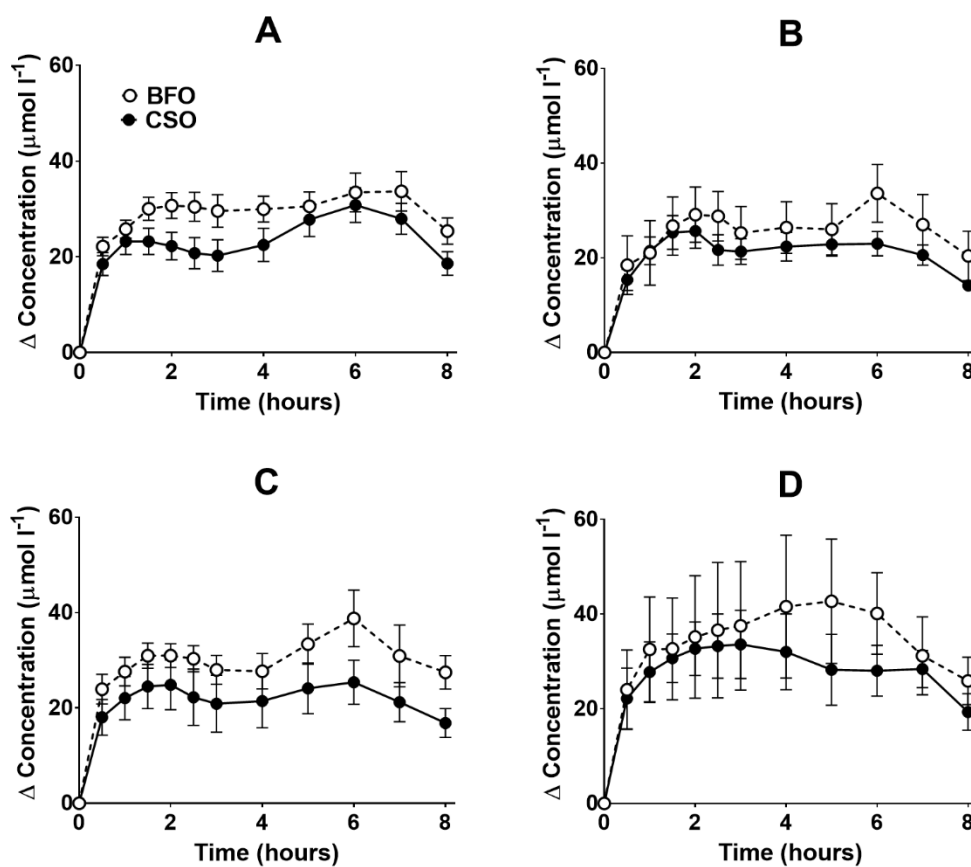

Values are mean (SEM) changes in concentration from baseline of EPA+ DHA in plasma triacylglycerol following consumption of test meals containing either CSO (solid symbols and lines) or BFO (open symbols and dashed lines). A, younger females ( $n$  10); B, younger males ( $n$  10); C, older females ( $n$  10); D older males ( $n$  6). The results of statistical analysis by ANOVA with Bonferroni's *post hoc* correction are described in Supplementary Table 1.

**Supplementary Table 1.** Results of statistical analysis of postprandial EPA and DHA concentrations in plasma triacylglycerol

|                  | EPA           |          | DHA           |          | EPA+DHA       |         |
|------------------|---------------|----------|---------------|----------|---------------|---------|
|                  | F(df)         | P        | F(df)         | P        | F(df)         | P       |
| Time             | 18.7 (4, 257) | < 0.0001 | 18.6 (4, 276) | < 0.0001 | 18.7 (4, 264) | <0.0001 |
| Time*oil         | 0.7 (4, 257)  | 0.6      | 0.9 (4, 276)  | 0.5      | 1.5 (4, 264)  | 0.2     |
| Time*age         | 2.3 (4, 257)  | 0.06     | 1.3 (4, 276)  | 0.3      | 0.9 (4, 264)  | 0.4     |
| Time*sex         | 0.8 (4, 257)  | 0.5      | 3.1 (4, 276)  | 0.1      | 2.7 (4, 264)  | 0.03    |
| Time*oil*sex     | 0.7 (4, 257)  | 0.6      | 0.3 (4, 276)  | 0.9      | 1.2 (4, 264)  | 0.3     |
| Time*oil*age     | 0.7 (4, 257)  | 0.6      | 1.0 (4, 276)  | 0.4      | 0.8 (4, 264)  | 0.5     |
| Time*age*sex     | 0.9 (4, 257)  | 0.6      | 0.3 (4, 276)  | 0.9      | 1.1 (4, 264)  | 0.3     |
| Time*oil*age*sex | 1.8 (4, 257)  | 0.1      | 1.0 (4, 276)  | 0.4      | 0.6 (4, 264)  | 0.7     |

Statistical analysis was by ANOVA with sex, type of oil and age as fixed factors and time as a repeated measure. Bonferroni's correction was applied *post hoc*.

**Supplementary Table 2.** Results of statistical analysis of postprandial EPA and DHA incremental area under the time\*concentration curve in plasma triacylglycerol

|                     | EPA         |          | DHA         |      | EPA+DHA    |       |
|---------------------|-------------|----------|-------------|------|------------|-------|
|                     | F(df)       | P        | F(df)       | P    | F(df)      | P     |
| Type of oil         | 1.6 (1,64)  | 0.2      | 0.2 (1, 64) | 0.7  | 0.7 (1,64) | 0.5   |
| Age                 | 13.5 (1,64) | < 0.0001 | 5.1 (1, 64) | 0.03 | 8.5 (1,64) | 0.004 |
| Sex                 | 0.8 (1,64)  | 0.3      | 2.6 (1, 64) | 0.1  | 0.5 (1,64) | 0.5   |
| Type of oil*sex     | 0.1 (1,64)  | 0.7      | 0.5 (1, 64) | 0.5  | 0.1 (1,64) | 0.8   |
| Type of oil*age     | 0.1 (1,64)  | 0.8      | 0.3 (1, 64) | 0.9  | 0.9 (1,64) | 0.3   |
| Age*sex             | 0.3 (1,64)  | 0.6      | 0.2 (1, 64) | 0.6  | 1.7 (1,64) | 0.2   |
| Type of oil*age*sex | 0.3 (1,64)  | 0.6      | 0.0 (1, 64) | 0.9  | 0.3 (1,64) | 0.6   |

Statistical analysis was by ANOVA with sex, type of oil and age as fixed factors. Bonferroni's correction was applied *post hoc*.

**Supplementary Table 3.** Results of statistical analysis of postprandial EPA and DHA concentrations in plasma phosphatidylcholine

|                  | EPA          |          | DHA           |          |
|------------------|--------------|----------|---------------|----------|
|                  | F(df)        | P        | F(df)         | P        |
| Time             | 9.3 (5, 344) | < 0.0001 | 10.7 (4, 264) | < 0.0001 |
| Time*oil         | 1.1 (5, 344) | 0.4      | 1.1 (4, 264)  | 0.4      |
| Time*age         | 0.7 (5, 344) | 0.03     | 0.5 (4, 264)  | 0.7      |
| Time*sex         | 2.0 (5, 344) | 0.07     | 1.4 (4, 264)  | 0.2      |
| Time*oil*sex     | 0.7 (5, 344) | 0.4      | 1.2 (4, 264)  | 0.3      |
| Time*oil*age     | 1.0 (5, 344) | 0.6      | 0.6 (4, 264)  | 0.7      |
| Time*age*sex     | 1.1 (5, 344) | 0.4      | 0.6 (4, 264)  | 0.7      |
| Time*oil*age*sex | 1.0 (5, 344) | 0.4      | 1.0 (4, 264)  | 0.4      |

Statistical analysis was by ANOVA with sex, type of oil and age as fixed factors. Bonferroni's correction was applied *post hoc*.

**Supplemental Table 4.** Results of statistical analysis of postprandial EPA and DHA incremental area under the time\*concentration curve in plasma phosphatidylcholine

|                     | EPA        |       | DHA        |      | EPA+DHA    |      |
|---------------------|------------|-------|------------|------|------------|------|
|                     | F(df)      | P     | F(df)      | P    | F(df)      | P    |
| Type of oil         | 0.1 (1,64) | 0.8   | 0.8 (1,64) | 0.4  | 0.7 (1,64) | 0.4  |
| Age                 | 7.3 (1,64) | 0.001 | 8.5 (1,64) | 0.01 | 7.2 (1,64) | 0.02 |
| Sex                 | 0.1 (1,64) | 0.8   | 1.3 (1,64) | 0.3  | 0.9 (1,64) | 0.3  |
| Type of oil*sex     | 0.1(1,64)  | 0.8   | 0.1 (1,64) | 0.8  | 0.4 (1,64) | 0.5  |
| Type of oil*age     | 0.2 (1,64) | 0.9   | 1.8 (1,64) | 0.2  | 0.8 (1,64) | 0.1  |
| Age*sex             | 0.5 (1,64) | 0.5   | 2.4 (1,64) | 0.1  | 1.3 (1,64) | 0.3  |
| Type of oil*age*sex | 0.1 (1,64) | 0.8   | 0.4 (1,64) | 0.5  | 0.5 (1,64) | 0.7  |

Statistical analysis was by ANOVA with sex, type of oil and age as fixed factors. Bonferroni's correction was applied *post hoc*.

**Supplementary Table 5.** Results of statistical analysis of postprandial EPA and DHA concentrations in plasma non-esterified fatty acids

|                  | EPA         |          | DHA          |          |
|------------------|-------------|----------|--------------|----------|
|                  | F(df)       | P        | F(df)        | P        |
| Time             | 6.0 (6,350) | < 0.0001 | 67.2 (5,322) | < 0.0001 |
| Time*oil         | 0.6 (6,350) | 0.7      | 0.4 (5,322)  | 0.8      |
| Time*age         | 1.1 (6,350) | 0.4      | 1.2 (5,322)  | 0.3      |
| Time*sex         | 1.8 (6,350) | 0.1      | 2.7 (5,322)  | 0.2      |
| Time*oil*sex     | 1.0 (6,350) | 0.4      | 0.9 (5,322)  | 0.5      |
| Time*oil*age     | 1.1 (6,350) | 0.3      | 1.4 (5,322)  | 0.2      |
| Time*age*sex     | 1.1 (6,350) | 0.3      | 1.6 (5,322)  | 0.2      |
| Time*oil*age*sex | 1.1 (6,350) | 0.4      | 0.6 (5,322)  | 0.7      |

Statistical analysis was by ANOVA with sex, type of oil and age as fixed factors. Bonferroni's correction was applied *post hoc*.

**Supplementary Table 6.** Results of statistical analysis of postprandial EPA and DHA incremental area under the time\*concentration curve in plasma non-esterified fatty acids

|                     | EPA        |     | DHA        |     |            |       |
|---------------------|------------|-----|------------|-----|------------|-------|
|                     | F(df)      | P   | F(df)      | P   | F(df)      | P     |
| Type of oil         | 3.9 (1,64) | 0.6 | 2.3 (1,64) | 0.1 | 0.2 (1,64) | 0.6   |
| Age                 | 0.3 (1,64) | 0.6 | 1.9 (1,64) | 0.2 | 9.7 (1,64) | 0.003 |
| Sex                 | 0.5 (1,64) | 0.5 | 1.3 (1,64) | 0.3 | 0.5 (1,64) | 0.5   |
| Type of oil*sex     | 9.8(1,64)  | 0.1 | 3.6 (1,64) | 0.1 | 0.1 (1,64) | 0.8   |
| Type of oil*age     | 2.0 (1,64) | 0.2 | 3.2 (1,64) | 0.1 | 0.9 (1,64) | 0.3   |
| Age*sex             | 0.3 (1,64) | 0.9 | 0.5 (1,64) | 0.5 | 1.7 (1,64) | 0.2   |
| Type of oil*age*sex | 4.5 (1,64) | 0.1 | 1.9 (1,64) | 0.2 | 0.3 (1,64) | 0.6   |

Statistical analysis was by ANOVA with sex, type of oil and age as fixed factors. Bonferroni's correction was applied *post hoc*.

**Supplementary Table 7.** Results of statistical analysis of postprandial lipoprotein concentrations and diameters

|                  | VLDL-CM       |          | LDL          |          | HDL          |          |
|------------------|---------------|----------|--------------|----------|--------------|----------|
|                  | F(df)         | P        | F(df)        | P        | F(df)        | P        |
|                  | Concentration |          |              |          |              |          |
| Time             | 23.8 (2,104)  | < 0.0001 | 62.8 (2,116) | < 0.0001 | 219.3 (2,93) | < 0.0001 |
| Time*oil         | 0.5 (2,104)   | 0.6      | 1.4 (2,116)  | 0.3      | 0.4 (2,93)   | 0.6      |
| Time*age         | 4.3 (2,104)   | 0.02     | 2.1 (2,116)  | 0.1      | 0.3 (2,93)   | 0.7      |
| Time*sex         | 1.0 (2,104)   | 0.4      | 1.4 (2,116)  | 0.3      | 2.5 (2,93)   | 0.1      |
| Time*oil*sex     | 0.01 (2,104)  | 0.9      | 0.4 (2,116)  | 0.7      | 0.3 (2,93)   | 0.7      |
| Time*oil*age     | 0.1.8 (2,104) | 0.2      | 0.5 (2,116)  | 0.6      | 0.6 (2,93)   | 0.5      |
| Time*age*sex     | 5.8 (2,104)   | < 0.01   | 0.03 (2,116) | 0.9      | 0.4 (2,93)   | 0.3      |
| Time*oil*age*sex | 0.1 (2,104)   | 0.9      | 0.03 (2,116) | 0.8      | 1.3 (2,93)   | 0.3      |
|                  | Diameter      |          |              |          |              |          |
| Time             | 8.1 (2,109)   | 0.001    | 25.8 (2,122) | < 0.0001 | 25.8 (2,117) | < 0.0001 |
| Time*oil         | 0.8 (2,109)   | 0.4      | 0.8 (2,122)  | 0.5      | 0.8 (2,117)  | 0.5      |
| Time*age         | 2.7 (2,109)   | 0.1      | 0.7 (2,122)  | 0.5      | 0.7 (2,117)  | 0.5      |
| Time*sex         | 0.5 (2,109)   | 0.6      | 0.1 (2,122)  | 0.9      | 0.1 (2,117)  | 0.8      |
| Time*oil*sex     | 2.0 (2,109)   | 0.2      | 1.7 (2,122)  | 0.2      | 1.7 (2,117)  | 0.2      |
| Time*oil*age     | 3.0 (2,109)   | 0.06     | 0.8 (2,122)  | 0.5      | 0.8 (2,117)  | 0.5      |
| Time*age*sex     | 0.4 (2,109)   | 0.9      | 0.9 (2,122)  | 0.4      | 0.9 (2,117)  | 0.4      |
| Time*oil*age*sex | 0.2 (2,109)   | 0.8      | 0.7 (2,122)  | 0.5      | 0.7 (2,117)  | 0.5      |

Statistical analysis was by ANOVA with sex, type of oil and age as fixed factors. Bonferroni's correction was applied *post hoc*.

**Supplementary Table 8.** Results of statistical analysis of postprandial inflammatory cytokine concentrations in plasma from younger participants

|              | TNF $\alpha$ |          | IL-6       |          | sICAM       |     | IL-10       |          |
|--------------|--------------|----------|------------|----------|-------------|-----|-------------|----------|
|              | F(df)        | P        | F(df)      | P        | F(df)       | P   | F(df)       | P        |
| Time         | 115 (4,122)  | < 0.0001 | 9.4 (3,63) | < 0.0001 | 1.9 (3,110) | 0.1 | 6.0 (7,218) | < 0.0001 |
| Time*oil     | 0.2 (4,122)  | 0.9      | 1.0 (3,63) | 0.4      | 1.5 (3,110) | 0.2 | 1.4 (7,218) | 0.2      |
| Time*sex     | 5.6 (4,122)  | 0.1      | 1.4 (3,63) | 0.3      | 0.8 (3,110) | 0.5 | 0.9 (7,218) | 0.5      |
| Time*oil*sex | 1.8 (4,122)  | 0.1      | 0.9 (3,63) | 0.5      | 2.1 (3,110) | 0.1 | 1.0 (7,218) | 0.4      |

Statistical analysis was by ANOVA with sex and type of oil fixed factors and time after the meal as a repeated measure. Bonferroni’s correction was applied *post hoc*.
